# Supplementary material for: A feed-forward relay integrates the regulatory activities of Bicoid and Orthodenticle via sequential binding to suboptimal sites
Source: PubMed Central journal article supplement — Genes Dev. 2018 May 1;32(9-10):723–36. doi: 10.1101/gad.311985.118 (PMC6004077; doi:10.1101/gad.311985.118), 2018-05-01
Supplement: supp_gad.311985.118_Supplemental_Figures.pdf [file supp_gad.311985.118_Supplemental_Figures.pdf]

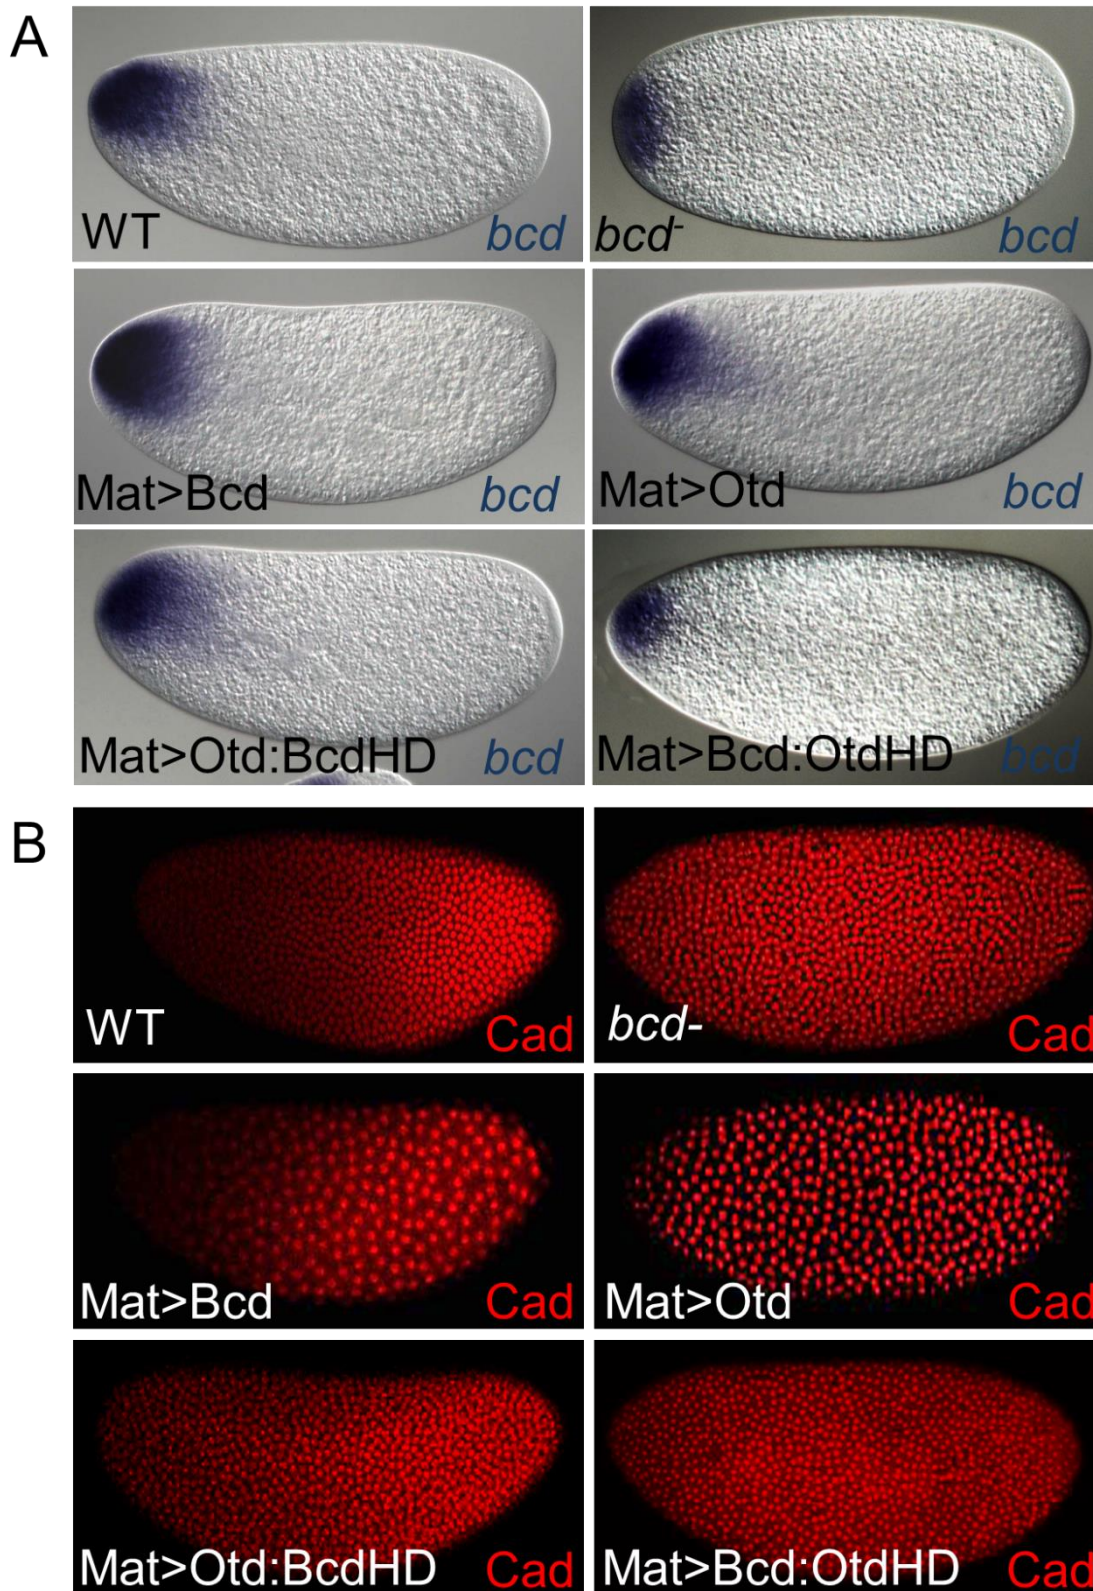

**Supplemental Figure 1.** (A) Maternal RNA expression. RNA is localized to the anterior tip for all constructs tested. Construct name and RNA detected are in the bottom left corner. (B) Expression of *Cad* in wild type, *bcd*<sup>-</sup>, and embryos containing maternal transgenes. Genotypes are indicated in the bottom left corner of the panel.

| Enhancer     | WT NC14 | MO NC14 | WT S6-8 | MO S6-8 | Enhancer | WT NC14 | MO NC14 | WT S6-8 | MO S6-8 |
|--------------|---------|---------|---------|---------|----------|---------|---------|---------|---------|
| HC_52        |         |         |         |         | gt1      |         |         |         |         |
| HC_36        |         |         |         |         | gt23     |         |         |         |         |
| HC_01        |         |         |         |         | prd      |         |         |         |         |
| <b>HC_08</b> |         |         |         |         | H        |         |         |         |         |
| HC_49        |         |         |         |         | tll      |         |         |         |         |
| HC_05        |         |         |         |         | Dich     |         |         |         |         |
| HC_06        |         |         |         |         | slpB     |         |         |         |         |
| HC_09        |         |         |         |         | mir7     |         |         |         |         |
| HC_15        |         |         |         |         | slpA     |         |         |         |         |
| HC_18        |         |         |         |         | eve1     |         |         |         |         |
| HC_29        |         |         |         |         | ems      |         |         |         |         |
| <b>HC_34</b> |         |         |         |         | CG9671   |         |         |         |         |

**Supplemental Figure 2.** The 24 Bcd-dependent enhancers tested in the Mat>Otd (MO) genetic background. The two enhancers activated by Mat>Otd are shown in red.

**A**

| CLASS 1                | Bound by:<br>Bcd S5 +<br>(Otd S5) +<br>Otd S6-8 | Other name* | S5<br>Expression | S6-8<br>Expression     | Bound by:<br>Bcd S5 +<br>(Otd S5) +<br>Otd S6-8 | Other name* | S5<br>Expression | S6-8<br>Expression     | Bound by:<br>Bcd S5 +<br>(Otd S5) +<br>Otd S6-8 | Other name* | S5<br>Expression | S6-8<br>Expression |
|------------------------|-------------------------------------------------|-------------|------------------|------------------------|-------------------------------------------------|-------------|------------------|------------------------|-------------------------------------------------|-------------|------------------|--------------------|
|                        | BcdOtd <sup>EL1</sup>                           | eve1        |                  |                        | BcdOtd <sup>EL11</sup>                          | HC_18       |                  |                        | BcdOtd <sup>EL21</sup>                          | HC_02       |                  |                    |
|                        | BcdOtd <sup>EL2</sup>                           | HC_16       |                  |                        | BcdOtd <sup>EL12</sup>                          | HC_05       |                  |                        | BcdOtd <sup>EL22</sup>                          | slpB        |                  |                    |
|                        | BcdOtd <sup>EL3</sup>                           | HC_27       |                  |                        | BcdOtd <sup>EL13</sup>                          | HC_23       |                  |                        | BcdOtd <sup>EL23</sup>                          | HC_06       |                  |                    |
|                        | BcdOtd <sup>EL4</sup>                           | HC_01       |                  |                        | BcdOtd <sup>EL14</sup>                          | HC_25       |                  |                        | BcdOtd <sup>EL24</sup>                          | HC_17       |                  |                    |
|                        | BcdOtd <sup>EL5</sup>                           | HC_34       |                  |                        | BcdOtd <sup>EL15</sup>                          | HC_29       |                  |                        | BcdOtd <sup>EL25</sup>                          | HC_49       |                  |                    |
|                        | BcdOtd <sup>EL6</sup>                           | otd_EHE     |                  |                        | BcdOtd <sup>EL16</sup>                          | HC_15       |                  |                        | BcdOtd <sup>EL26</sup>                          | HC_14       |                  |                    |
|                        | BcdOtd <sup>EL7</sup>                           | HC_03       |                  |                        | BcdOtd <sup>EL17</sup>                          | prd_OE      |                  |                        | BcdOtd <sup>EL27</sup>                          | HC_19       |                  |                    |
|                        | BcdOtd <sup>EL8</sup>                           | gt1         |                  |                        | BcdOtd <sup>EL18</sup>                          | HC_36       |                  |                        | BcdOtd <sup>EL28</sup>                          | tlI_OE      |                  |                    |
|                        | BcdOtd <sup>EL9</sup>                           | HC_12       |                  |                        | BcdOtd <sup>EL19</sup>                          | HC_04       |                  |                        | BcdOtd <sup>EL29</sup>                          | HC_33       |                  |                    |
| BcdOtd <sup>EL10</sup> | HC_35                                           |             |                  | BcdOtd <sup>EL20</sup> | HC_08                                           |             |                  | BcdOtd <sup>EL30</sup> | HC_26                                           |             |                  |                    |

\*as described in Ochoa-Espinoza et al. 2008 and Chen et al. 2012

**B**

| Enhancer              | WT | <i>Otd</i> <sup>-</sup> |
|-----------------------|----|-------------------------|-----------------------|----|-------------------------|-----------------------|----|-------------------------|-----------------------|----|-------------------------|
| BcdOtd <sup>EL1</sup> |    |                         | BcdOtd <sup>EL3</sup> |    |                         | BcdOtd <sup>EL5</sup> |    |                         | BcdOtd <sup>EL7</sup> |    |                         |
| BcdOtd <sup>EL1</sup> |    |                         | BcdOtd <sup>EL3</sup> |    |                         | BcdOtd <sup>EL5</sup> |    |                         | BcdOtd <sup>EL7</sup> |    |                         |
| BcdOtd <sup>EL1</sup> |    |                         | BcdOtd <sup>EL3</sup> |    |                         | BcdOtd <sup>EL5</sup> |    |                         | BcdOtd <sup>EL7</sup> |    |                         |
| BcdOtd <sup>EL1</sup> |    |                         | BcdOtd <sup>EL3</sup> |    |                         | BcdOtd <sup>EL5</sup> |    |                         | BcdOtd <sup>EL7</sup> |    |                         |
| BcdOtd <sup>EL1</sup> |    |                         | BcdOtd <sup>EL3</sup> |    |                         | BcdOtd <sup>EL5</sup> |    |                         | BcdOtd <sup>EL7</sup> |    |                         |
| BcdOtd <sup>EL2</sup> |    |                         | BcdOtd <sup>EL4</sup> |    |                         | BcdOtd <sup>EL6</sup> |    |                         | BcdOtd <sup>EL8</sup> |    |                         |
| BcdOtd <sup>EL2</sup> |    |                         | BcdOtd <sup>EL4</sup> |    |                         | BcdOtd <sup>EL6</sup> |    |                         | BcdOtd <sup>EL8</sup> |    |                         |
| BcdOtd <sup>EL2</sup> |    |                         | BcdOtd <sup>EL4</sup> |    |                         | BcdOtd <sup>EL6</sup> |    |                         | BcdOtd <sup>EL8</sup> |    |                         |
| BcdOtd <sup>EL2</sup> |    |                         | BcdOtd <sup>EL4</sup> |    |                         | BcdOtd <sup>EL6</sup> |    |                         | BcdOtd <sup>EL8</sup> |    |                         |
| BcdOtd <sup>EL2</sup> |    |                         | BcdOtd <sup>EL4</sup> |    |                         | BcdOtd <sup>EL6</sup> |    |                         | BcdOtd <sup>EL8</sup> |    |                         |

**Supplemental Figure 3** (A) *lacZ* expression patterns of a subset of “relay” enhancers (Class 1). (B) Representative embryos from relay enhancer lines showing loss of expression in *Otd* mutants.

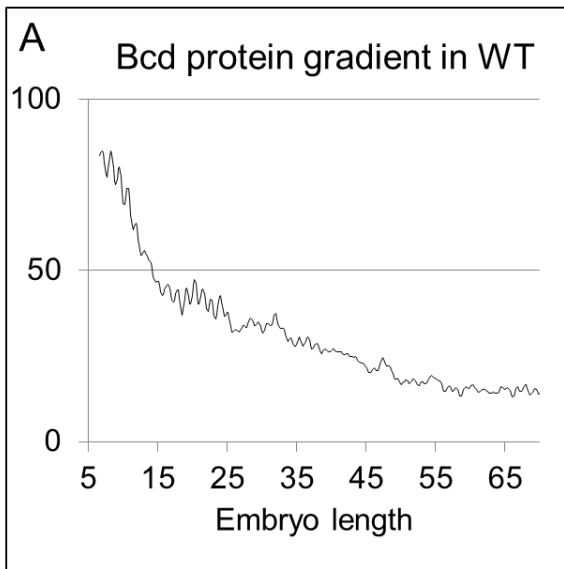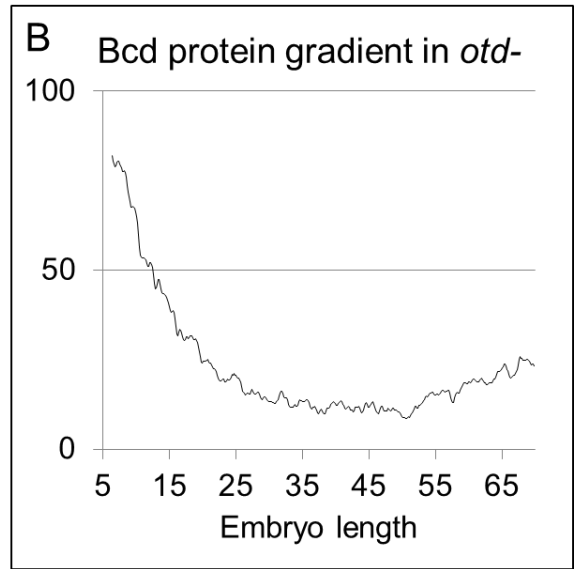

**Supplemental Figure 4. (A)** Bcd protein gradient in WT and **(B)** *otd-* embryos.



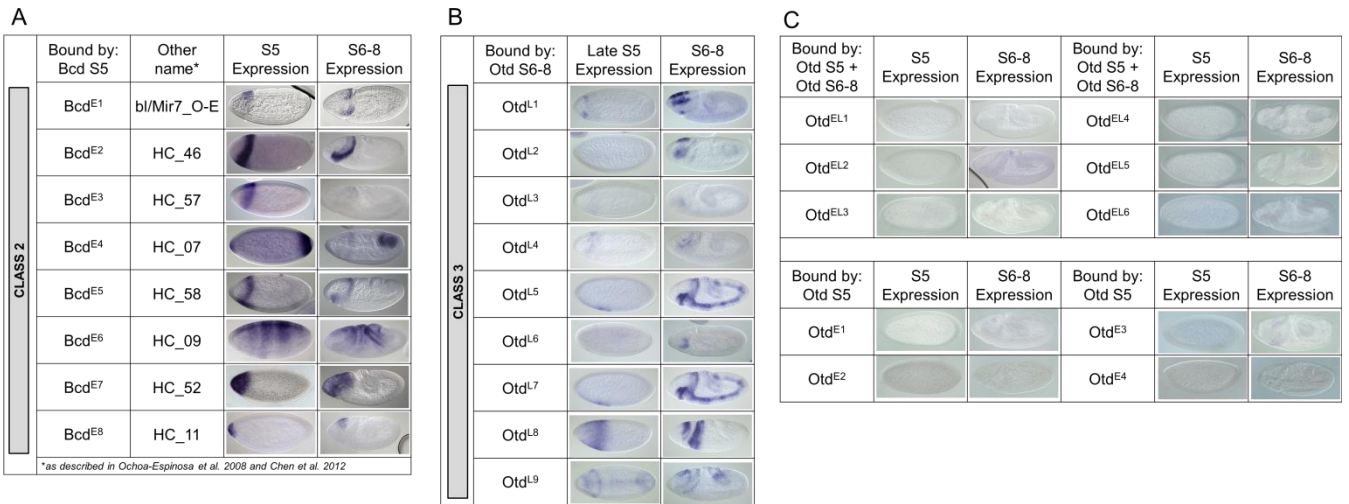

**Supplemental Figure 5.** *lacZ* expression patterns of Bcd and Otd bound enhancers. (A) Class 2 enhancers are bound by Bcd and expressed at both timepoints. (B) Class 3 enhancers are bound by Bcd and Otd and are expressed at both timepoints. (C) Otd-bound fragments that are not bound by Bcd do not show any expression.
